# Supplementary material
Source: PubMed Central journal article supplement (PMC2941265)
Supplement: 1002603107_pnas.201002603SI.pdf [file 1002603107_pnas.201002603SI.pdf]

# Supporting Information

Wang et al. 10.1073/pnas.1002603107

## SI Results

**Fanconi Anemia Complementation Group Core Activity Is Not Required for C/EBP $\delta$ -Mediated Nuclear Import of Fanconi Anemia Complementation Group D2 Protein.** In cells that lack Fanconi anemia complementation group A (FANCA), an essential component of the Fanconi anemia (FA) ubiquitin ligase core complex (1–3), mitomycin C (MMC) still promoted nuclear translocation of FANCD2, which was impaired again by silencing of CCAAT/enhancer binding protein  $\delta$  (C/EBP $\delta$ ) (Fig. S5). Consistent with the loss of FANCD2 core complex function, only the FANCD2-S isoform was observed, unless the cells were reconstituted with FANCA (Fig. S5B). These data show that monoubiquitination of FANCD2 is not required for nuclear translocation, consistent with the notion that this modification occurs within the nucleus (1–3). In FANCA-deficient cells, MMC also induced C/EBP $\delta$  expression, which therefore is independent of the FA pathway (Fig. S5A).

**C/EBP $\delta$  Is Not Required for MMC-Induced FANCD2 Foci.** Because monoubiquitinated FANCD2 specifically binds to sites of DNA damage (4, 5), we also analyzed the effect of C/EBP $\delta$  depletion on the subcellular localization of FANCD2 in FANCD2-null PD20 fibroblasts reconstituted with FANCD2 (PD20-D2) cells (Fig. S6). MMC-induced focal localization of FANCD2 was observed even when C/EBP $\delta$  was silenced, although the overall intensity of staining was reduced. These data are consistent with a role for C/EBP $\delta$  in nuclear translocation of FANCD2 and suggest that C/EBP $\delta$  is not required for the binding of FANCD2-L to sites of DNA damage. This experiment also showed that C/EBP $\delta$  does not colocalize with FANCD2 to the sites of DNA-damage (Fig. S6).

## SI Materials and Methods

**Cells.** WT and C/EBP $\delta$ -KO mouse embryo fibroblasts (MEFs) were generated as described (6). The cell lines PD20, PD20-D2, PD220, and PD220RV were obtained from the Fanconi Anemia Research Fund. 293-C/EBP $\delta$  cells were as described (7). All cell lines were maintained in DMEM (Invitrogen) supplemented with 10% (15% for PD220) FBS (Invitrogen) and were incubated in a 5% CO $_2$  humidified atmosphere at 37 °C. Cells were transiently transfected with expression constructs using TransIT-LT1 (Bio LLC #2300A; Mirus). Extracts were prepared 24 h later if cells were untreated. Otherwise, cells were treated the following day with MMC at 1  $\mu$ g/mL for 24 h, unless indicated otherwise. Cells were transfected with empty vector as control.

**Plasmids.** To generate the amino acids 1–151, amino acids 140–215, and C/EBP $\delta$ - $\Delta$ DBD constructs, the corresponding regions were PCR amplified and subcloned into shuttle vector 5'Flag-SK+ by Nhe I and Bam HI. The Flag-tagged C/EBP $\delta$  cassettes were excised by Sal I and Xba I and subcloned into pMEX mammalian expression vector by blunt-end ligation into Sma I. To generate the C/EBP $\delta$  mutant lacking the FANCD2 interaction domain ( $\Delta$ D2ID), PCR was performed using a 5' primer containing a NotI restriction enzyme site and DNA sequence coding for amino acids 192–194 and a 3' primer harboring an EcoRI site downstream of the coding region. The PCR product was then inserted into a NotI- and EcoRI-digested WT expression construct, replacing the WT sequence. All final products were verified by sequencing.

**Cell Survival and Colony Formation Assays.** Cells were seeded in 96-well plates at 3,000–5,000 cells/well and were treated the next day with MMC and/or tetracycline as indicated. Each experiment was done with triplicate wells. Cells were incubated with 10% Alamar

blue (BioSource) for 3 h, and fluorescence was quantified with a NovaStars (BMG) plate reader. Mouse bone marrow cell colony assays were performed using MethoCult (Stem Cell Technologies) according to the manufacturer's protocol, seeding 25,000 cells per 35-mm dish. Colonies were counted after 10–14 d of incubation, blinded to the genotype and treatment.

**Flow cytometric Analysis.** Cells were trypsinized, fixed in 70% ethanol, stained with propidium iodide, and analyzed by fluorescence-activated cell sorting using FACSCalibur and CellQuest software (Fig. 2D) or FACSCanto II and DiVa software (Fig. 2E) (Becton Dickinson).

**Immunocytochemistry.** WT and C/EBP $\delta$  KO MEFs were seeded at  $\approx$ 30% confluence on coverslips. The cells were washed with PBS 16 h later and were fixed with 2% formaldehyde (Electron Microscopy Sciences) for 20 min. Cells were permeabilized with 0.3% Triton X-100 in PBS for 15 min and quenched with 1% glycine in PBS for 5 min. The phosphorylated form of H2AX ( $\gamma$ H2AX) was detected with polyclonal anti- $\gamma$ H2AX (1:600; Millipore) and Alexa Fluor 488 goat anti-rabbit IgG (1:1,000; Invitrogen) in 3% BSA. C/EBP $\delta$  and FANCD2 were detected with monoclonal anti-C/EBP $\delta$  (1:1,000; BD Biosciences) and polyclonal anti-FANCD2 (1:1,000; Novus), Alexa Fluor 594 goat anti-mouse IgG (1:1,000, Invitrogen), and Alexa Fluor 488 goat anti-rabbit IgG (1:1,000, Invitrogen) in 3% BSA. Cell nuclei were detected with 0.1% DAPI (Invitrogen). Cells were visualized with an LSM 510 META confocal fluorescence microscope (Zeiss).

**Protein Extracts and Western Analysis.** Cells were lysed in lysis buffer (30 mM Tris, pH 8.0, 75 mM NaCl, 10% glycerol, 1% Triton X-100) with protease inhibitors (1 mM phenylmethylsulfonyl fluoride, 10  $\mu$ g/mL phosphatase inhibitor I and phosphatase inhibitor II, 10  $\mu$ g/mL protease inhibitor mixture) for immunoprecipitation. Whole-cell lysates were prepared with SDS sample buffer. Cytoplasmic and nuclear fractionation was done essentially according to methods described (8). The proteins were resolved by SDS/PAGE and transferred onto PROTRAN nitrocellulose membranes (Schleicher & Schull). Membranes were blocked with 5% skim milk in 10 mM Tris-HCl (pH 7.5), 150 mM NaCl, and 0.5% Tween20 (TBS-T). After incubation with primary antibodies and secondary antibodies in TBS-T, the protein signals were visualized by Lumiglo Reserve Chemiluminescence reagent (KPL Inc.) according to the manufacturer's instructions. Antibodies were from Novus (FANCD2, NB-100-182), Santa Cruz Biotechnology Inc. (FANCD2, H-300; GAPDH, 0–411), BD Biosciences Pharmingen (C/EBP $\delta$ , BD69319), Fanconi Anemia Research Fund, Inc. (FANCA, R6512), Proteintech Group (IPO4, 11679–1-AP), Rockland Immunologicals Inc. (tubulin, 600–401-880; C/EBP $\delta$ , 600–401-A61), Millipore (Ser139 phosphorylated H2AX, 07–164), Pierce (anti-mouse and anti-rabbit HRP-conjugated IgG, #1858413 and #1858415), Bethyl Laboratories Inc. (A300-083A), and Thermo Scientific (anti-goat HRP-conjugated IgG, #31400). Quantification of FANCD2-L and -S ratios was done using ImageJ software (National Institutes of Health; <http://rsb.info.nih.gov/ij/>).

**Coimmunoprecipitation.** Cell lysate (1 mg) was mixed with antibody (5  $\mu$ g) and rotated overnight at 4 °C. An equivalent aliquot of lysate for specific antibodies as indicated was used for immunoprecipitation with IgG as a negative control. Protein A/G beads were blocked with 1% BSA and 1 mg/mL ssDNA overnight. Preblocked

beads (40  $\mu$ L) were added to the lysate and antibody mixture for 4 h at 4 °C before centrifugation at 1,000  $\times$  g rpm (Eppendorf) for 30 s, followed by five washes with lysis buffer. Preboiled sample buffer (40  $\mu$ L) (Bio-RAD) was added to each immunoprecipitation mixture and denatured in 100 °C for another 5 min. Then 10  $\mu$ L of each immunoprecipitation product was loaded.

**RNAi.** On-Target plus SMARTpool siRNA for IPO4 (catalog #L-009516-01) and C/EBP $\delta$  (catalog# L-010453-00) were purchased from Dharmacon RNAi Technologies (Thermo Scientific) along with Accell Red nontargeting siRNA (catalog #D-001960-01-05)

- Moldovan GL, D'Andrea AD (2009) How the Fanconi anemia pathway guards the genome. *Annu Rev Genet* 43:223–249.
- Thompson LH, Hinz JM (2009) Cellular and molecular consequences of defective Fanconi anemia proteins in replication-coupled DNA repair: Mechanistic insights. *Mutat Res* 668:54–72.
- Knipscheer P, et al. (2009) The Fanconi anemia pathway promotes replication-dependent DNA interstrand cross-link repair. *Science* 326:1698–1701.
- Bagby GC, Jr (2003) Genetic basis of Fanconi anemia. *Curr Opin Hematol* 10:68–76.
- D'Andrea AD, Grompe M (2003) The Fanconi anaemia/BRCA pathway. *Nat Rev Cancer* 3:23–34.
- Huang AM, et al. (2004) Loss of CCAAT/enhancer binding protein  $\delta$  promotes chromosomal instability. *Oncogene* 23:1549–1557.
- Pawar SA, et al. (2010) C/EBPdelta targets cyclin D1 for proteasome-mediated degradation via induction of CDC27/APC3 expression. *Proc Natl Acad Sci USA* 107: 9210–9215.
- Schreiber E, Matthias P, Müller MM, Schaffner W (1989) Rapid detection of octamer binding proteins with 'mini-extracts', prepared from a small number of cells. *Nucleic Acids Res* 17:6419.
- Wang JM, Ko CY, Chen LC, Wang WL, Chang WC (2006) Functional role of NF-IL6beta and its sumoylation and acetylation modifications in promoter activation of cyclooxygenase 2 gene. *Nucleic Acids Res* 34:217–231.
- Tiscornia G, Singer O, Ikawa M, Verma IM (2003) A general method for gene knockdown in mice by using lentiviral vectors expressing small interfering RNA. *Proc Natl Acad Sci USA* 100:1844–1848.

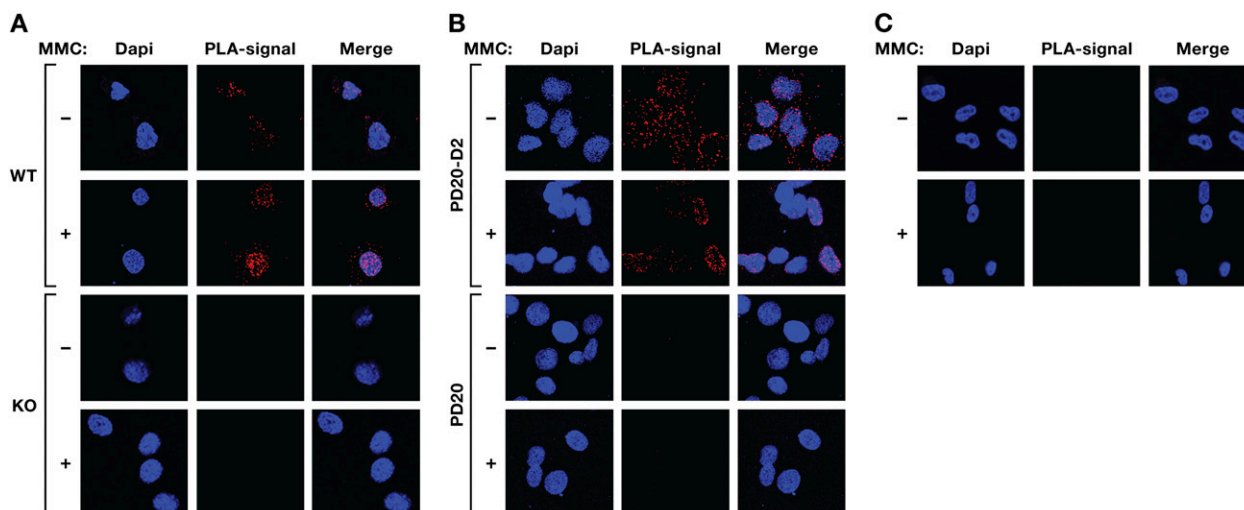

**Fig. S1.** Interaction of endogenous C/EBP $\delta$  and FANCD2. (A) WT and KO MEFs were treated for 3 h with 5  $\mu$ g/mL MMC as indicated. Cells were fixed and incubated with antibodies against C/EBP $\delta$  and FANCD2 followed by OLink in situ proximity ligation assay (PLA) and fluorescence microscopy using appropriate filters. Merged images of antibody proximity (red) and nuclei (blue) are shown on the right. (B) FANCD2-deficient cells (PD20) and FANCD2-deficient cells reconstituted with WT FANCD2 (PD20-D2) were treated for 20 h with 500 ng/mL MMC before processing as described in A. The merged images are the same as in Fig. 1 D and E. (C) PD20-D2 cells were treated as in B. The cells then were incubated with antibodies against C/EBP $\delta$  and FANCA followed by OLink PLA assay as described in A.

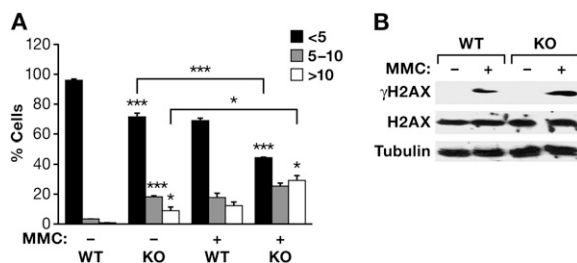

**Fig. 52.** Analysis of  $\gamma$ H2AX in response to DNA damage. (A) Quantification of DNA damage-response foci containing  $\gamma$ H2AX. WT and C/EBP $\delta$ -null (KO) primary MEFs cultured on coverslips were fixed and immunostained for  $\gamma$ H2AX after 3 h of MMC (5  $\mu$ g/mL) treatment. For each sample, at least 100 nuclei were examined by fluorescence microscopy and categorized as having <5, 5–10, or >10 foci. The percentage of cells in each category is shown as mean  $\pm$  SEM of three independent WT-MEF and KO-MEF preparations, respectively. *P* values refer to comparison of WT and KO samples of the same treatment group unless indicated otherwise; \**P* < 0.05; \*\*\**P* < 0.001. (B) H2AX phosphorylation in response to MMC. Immortalized WT and KO MEFs were harvested after 24 h of MMC (1  $\mu$ g/mL) treatment, followed by Western blot analysis of the indicated proteins in whole-cell lysates. Untreated cells were used as controls.

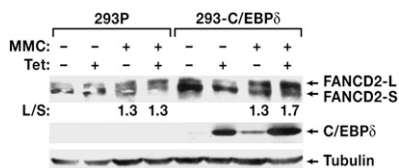

**Fig. 53.** C/EBP $\delta$  augments FANCD2 monoubiquitination in response to MMC. Western blot analysis of FANCD2 and C/EBP $\delta$  in whole-cell lysates from HEK293 cells with tetracycline-inducible C/EBP $\delta$  expression (293-C/EBP $\delta$ ) and the parental cell line (293P) treated with tetracycline (Tet; 500 ng/mL) and/or MMC (1  $\mu$ g/mL) for 24 h. L/S, quantification of the FANCD2-L/S ratio in lysates of MMC-treated cells.

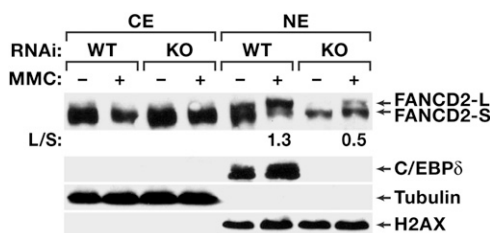

**Fig. 54.** C/EBP $\delta$  augments nuclear localization of FANCD2 in MEFs. WT and C/EBP $\delta$ -KO MEFs were treated with 1  $\mu$ g/mL MMC for 20 h as indicated, followed by Western blot analysis of protein expression in cytoplasmic (CE) and nuclear (NE) extracts. Tubulin and H2AX were used as markers for cytoplasmic and nuclear extracts, respectively. L/S, quantification of the FANCD2-L/S ratio in lysates of MMC-treated cells.

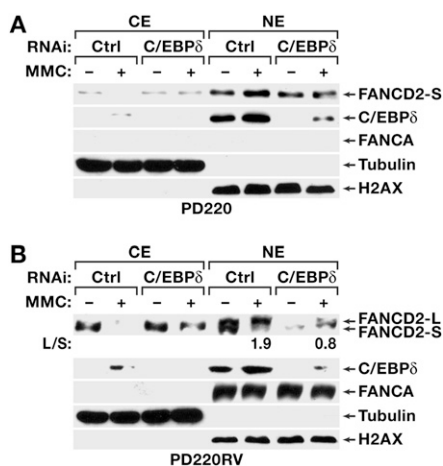

**Fig. 55.** C/EBP $\delta$  augments nuclear import of FANCD2 in FANCA core-deficient cells. (A) FANCA-deficient cells (PD220) and (B) PD220 cells reconstituted with WT FANCA (PD220RV) were transiently transfected with siRNA against C/EBP $\delta$  or with scrambled oligos as control. MMC (500 ng/mL) was added 24 h later, and cells were incubated for another 20 h followed by Western blot analysis of protein expression in cytoplasmic (CE) and nuclear (NE) extracts. Tubulin and H2AX were used as markers for cytoplasmic and nuclear extracts, respectively. L/S, quantification of the FANCD2-L/S ratio in lysates of MMC-treated cells.



**Table S1. Proteins interacting with C/EBP $\delta$  by mass spectrometry**

| Gene name | Accession no. | Unique peptides identified using MS <sup>†</sup> | Total peptide count <sup>‡</sup> | Common name(s), aliases                                                                                                         | Function                     |
|-----------|---------------|--------------------------------------------------|----------------------------------|---------------------------------------------------------------------------------------------------------------------------------|------------------------------|
| FANCD2    | Q9BXW9        | K.AIEEIVAGVGPVPELINSK.D                          | 13                               | Fanconi anemia group D2 protein                                                                                                 | DNA repair                   |
|           |               | K.DASSSTFPTLTR.H                                 | 13                               |                                                                                                                                 |                              |
|           |               | K.DGGPVTSEQESGQK.L                               | 3                                |                                                                                                                                 |                              |
|           |               | K.GILDYLDNISPPQIR.K                              | 5                                |                                                                                                                                 |                              |
|           |               | K.LLLGIDILQPAIHK.T                               | 5                                |                                                                                                                                 |                              |
|           |               | K.LPEYFFENK.N                                    | 14                               |                                                                                                                                 |                              |
|           |               | K.TGESQNQLAVDQIAFQK.K                            | 10                               |                                                                                                                                 |                              |
|           |               | K.AGLLVAVLSDGAGDHIR.Q                            | 9                                |                                                                                                                                 |                              |
|           |               | K.LLGLLFPLLAR.E                                  | 13                               |                                                                                                                                 |                              |
|           |               | K.SFAVGTLAETIQGLGAASAQFVSR.L                     | 2                                |                                                                                                                                 |                              |
| IPO4      | Q8TEX9        | K.SLILTALQR.E                                    | 12                               | Importin-4 (Importin 4b) (Imp4b)<br>Ran-binding protein 4 (RanBP4)                                                              | Nuclear import               |
|           |               | R.EVMPLLLAYLK.S                                  | 9                                |                                                                                                                                 |                              |
|           |               | R.LLPVLLSTAQEAPEVR.S                             | 27                               |                                                                                                                                 |                              |
|           |               | R.NAALFALGQFSENLPQPHISSYSR.E                     | 3                                |                                                                                                                                 |                              |
|           |               | R.RATEQLQIVLR.A                                  | 9                                |                                                                                                                                 |                              |
|           |               | R.TLTTMAPYLSTEDVPLAR.M                           | 9                                |                                                                                                                                 |                              |
|           |               | R.VVPSYMQAVNR.E                                  | 9                                |                                                                                                                                 |                              |
|           |               | R.VVPSYMQAVNR.E                                  | 9                                |                                                                                                                                 |                              |
|           |               | R.VVPSYMQAVNR.E                                  | 9                                |                                                                                                                                 |                              |
|           |               | R.VVPSYMQAVNR.E                                  | 9                                |                                                                                                                                 |                              |
| SPAG5     | Q96R06        | K.ELQEVIQQNEK.I                                  | 6                                | Sperm-associated antigen 5 (Astrin)<br>Mitotic spindle associated protein p126                                                  | Mitotic spindle              |
|           |               | K.ILEQIDK.S                                      | 6                                |                                                                                                                                 |                              |
|           |               | K.LASTIADNQEQDLEK.T                              | 10                               |                                                                                                                                 |                              |
|           |               | K.LGLQEGSNSSPVDVFNK.R                            | 3                                |                                                                                                                                 |                              |
|           |               | K.SGELISLR.E                                     | 6                                |                                                                                                                                 |                              |
|           |               | K.STNTSQTGLVGTK.H                                | 7                                |                                                                                                                                 |                              |
|           |               | R.ELTLQPGALTNSGK.R                               | 3                                |                                                                                                                                 |                              |
|           |               | R.NVMQSWVLISK.E                                  | 6                                |                                                                                                                                 |                              |
|           |               | R.NVMQSWVLISK.E                                  | 6                                |                                                                                                                                 |                              |
|           |               | R.NVMQSWVLISK.E                                  | 6                                |                                                                                                                                 |                              |
| TRIM26    | Q12899        | K.AQQPAAELMQDTR.D                                | 4                                | Tripartite motif protein 26<br>Zinc finger protein 173 (ZNF173),<br>Acid finger protein (AFP)<br>RING finger protein 95 (RNF95) | Putative ubiquitin E3 ligase |
|           |               | K.ENIRPVWQLASLVENIER.L                           | 4                                |                                                                                                                                 |                              |
|           |               | K.GEADILAALK.K                                   | 3                                |                                                                                                                                 |                              |
|           |               | K.LEQELTEGR.E                                    | 8                                |                                                                                                                                 |                              |
|           |               | R.LALVISELEGK.A                                  | 7                                |                                                                                                                                 |                              |
|           |               | K.AQQPAAELMQDTR.D                                | 4                                |                                                                                                                                 |                              |
|           |               | K.GEADILAALK.K                                   | 8                                |                                                                                                                                 |                              |
|           |               | R.RLVPFLWLK.W                                    | 4                                |                                                                                                                                 |                              |
|           |               | R.RLVPFLWLK.W                                    | 4                                |                                                                                                                                 |                              |
|           |               | R.RLVPFLWLK.W                                    | 4                                |                                                                                                                                 |                              |
| UBR5      | O95071        | K.IVLLSANSIR.A                                   | 4                                | Ubiquitin protein ligase E3 component n-recogin 5<br>Ubiquitin-protein ligase EDD1<br>Hyperplastic discs protein homolog (hHYD) | Ubiquitin E3 ligase          |
|           |               | K.LEHTAQTYSELQGER.I                              | 8                                |                                                                                                                                 |                              |
|           |               | K.YNHLVYSQIPAAVK.L                               | 3                                |                                                                                                                                 |                              |
|           |               | R.AYPAAITILETAQK.I                               | 4                                |                                                                                                                                 |                              |
|           |               | R.LLTATNLVTLPNR.G                                | 6                                |                                                                                                                                 |                              |
|           |               | R.NVAIFTAGQESPIILR.D                             | 10                               |                                                                                                                                 |                              |
|           |               | R.NVAIFTAGQESPIILR.D                             | 10                               |                                                                                                                                 |                              |
|           |               | R.NVAIFTAGQESPIILR.D                             | 10                               |                                                                                                                                 |                              |
|           |               | R.NVAIFTAGQESPIILR.D                             | 10                               |                                                                                                                                 |                              |
|           |               | R.NVAIFTAGQESPIILR.D                             | 10                               |                                                                                                                                 |                              |
| XPO1      | O14980        | K.AIIASNIMYIVGQYPR.F                             | 11                               | Exportin-1<br>Chromosome region maintenance 1 protein homolog                                                                   | Nuclear export               |
|           |               | K.DFEYPEHR.T                                     | 11                               |                                                                                                                                 |                              |
|           |               | K.EFAGEDTSDLFLEER.E                              | 11                               |                                                                                                                                 |                              |
|           |               | K.LFVTGLFSLNQDIPAFK.E                            | 11                               |                                                                                                                                 |                              |
|           |               | K.LISGWVSR.S                                     | 11                               |                                                                                                                                 |                              |
|           |               | K.LISTLIYK.F                                     | 11                               |                                                                                                                                 |                              |
|           |               | K.LLSEEVDFSSGQITQVK.S                            | 11                               |                                                                                                                                 |                              |
|           |               | K.LVLDIIWAFK.H                                   | 22                               |                                                                                                                                 |                              |
|           |               | K.LVLDIIWAFK.H                                   | 22                               |                                                                                                                                 |                              |
|           |               | K.NVDILKDPETVK.Q                                 | 11                               |                                                                                                                                 |                              |
|           |               | K.NVDILKDPETVK.Q                                 | 11                               |                                                                                                                                 |                              |
|           |               | K.YYGLQILENVIK.T                                 | 13                               |                                                                                                                                 |                              |
|           |               | K.YYGLQILENVIK.T                                 | 13                               |                                                                                                                                 |                              |

Cycling 293T cells expressing Pyo-tag'd wild-type C/EBP $\delta$  or vector control-transfected cells were lysed in Triton X-100 lysis buffer (20 mM Tris [pH 8.0], 50 mM NaCl, 10% glycerol, 1% Triton X-100, 0.15 U/mL aprotinin, 1 mM PMSF, 20  $\mu$ M leupeptin, and 5 mM sodium vanadate). Immunoprecipitates with anti-pyo antibodies were resolved by PAGE. Each lane was cut into 20 gel fractions and proteins were isolated and analyzed by mass spectrometry as previously described (1). Only one sample was run per condition. Because of this preliminary nature of the experiment, only those proteins are shown that were represented by more than five independent peptides and more than 10 counts total. Proteins of peptides that were also detected in vector control cells or immunoprecipitated with other pyo-tagged proteins (2) were not included in this list. FANCD2 and IPO4 are subject of this publication. Based on these data, XPO1 is the likely mediator of C/EBP $\delta$  export from the nucleus. UBR5 and TRIM26 are candidates for targeting C/EBP $\delta$  for proteasomal degradation. The interaction with SPAG5 is also intriguing due to the potential role of SPAG5 in the DNA-damage response (3) and will be subject of future studies.

<sup>†</sup>Identity of unique peptides identified for the protein listed.

<sup>‡</sup>Number of times the unique peptide was identified using mass spectrometry.

1. Ory S, Zhou M, Conrads TP, Veenstra TD, Morrison DK (2003) Protein phosphatase 2A positively regulates Ras signaling by dephosphorylating KSR1 and Raf-1 on critical 14-3-3 binding sites. *Curr Biol* 13:1356–1364.
2. Dougherty MK, et al. (2009) KSR2 is a calcineurin substrate that promotes ERK cascade activation in response to calcium signals. *Mol Cell* 34:652–662.
3. Liu L, et al. (2009) SNM1B/Apollo interacts with astrin and is required for the prophase cell cycle checkpoint. *Cell Cycle* 8:628–638.
